# Supplementary material for: The GRAS gene family and its roles in pineapple (Ananas comosus L.) developmental regulation and cold tolerance
Source: PubMed Central journal article supplement — BMC Plant Biol. 2024 Dec 19;24:1204. doi: 10.1186/s12870-024-05913-9 (PMC11657692; doi:10.1186/s12870-024-05913-9), 2024-12-19
Supplement: 12870_2024_5913_MOESM5_ESM.pdf [file 12870_2024_5913_MOESM5_ESM.pdf]

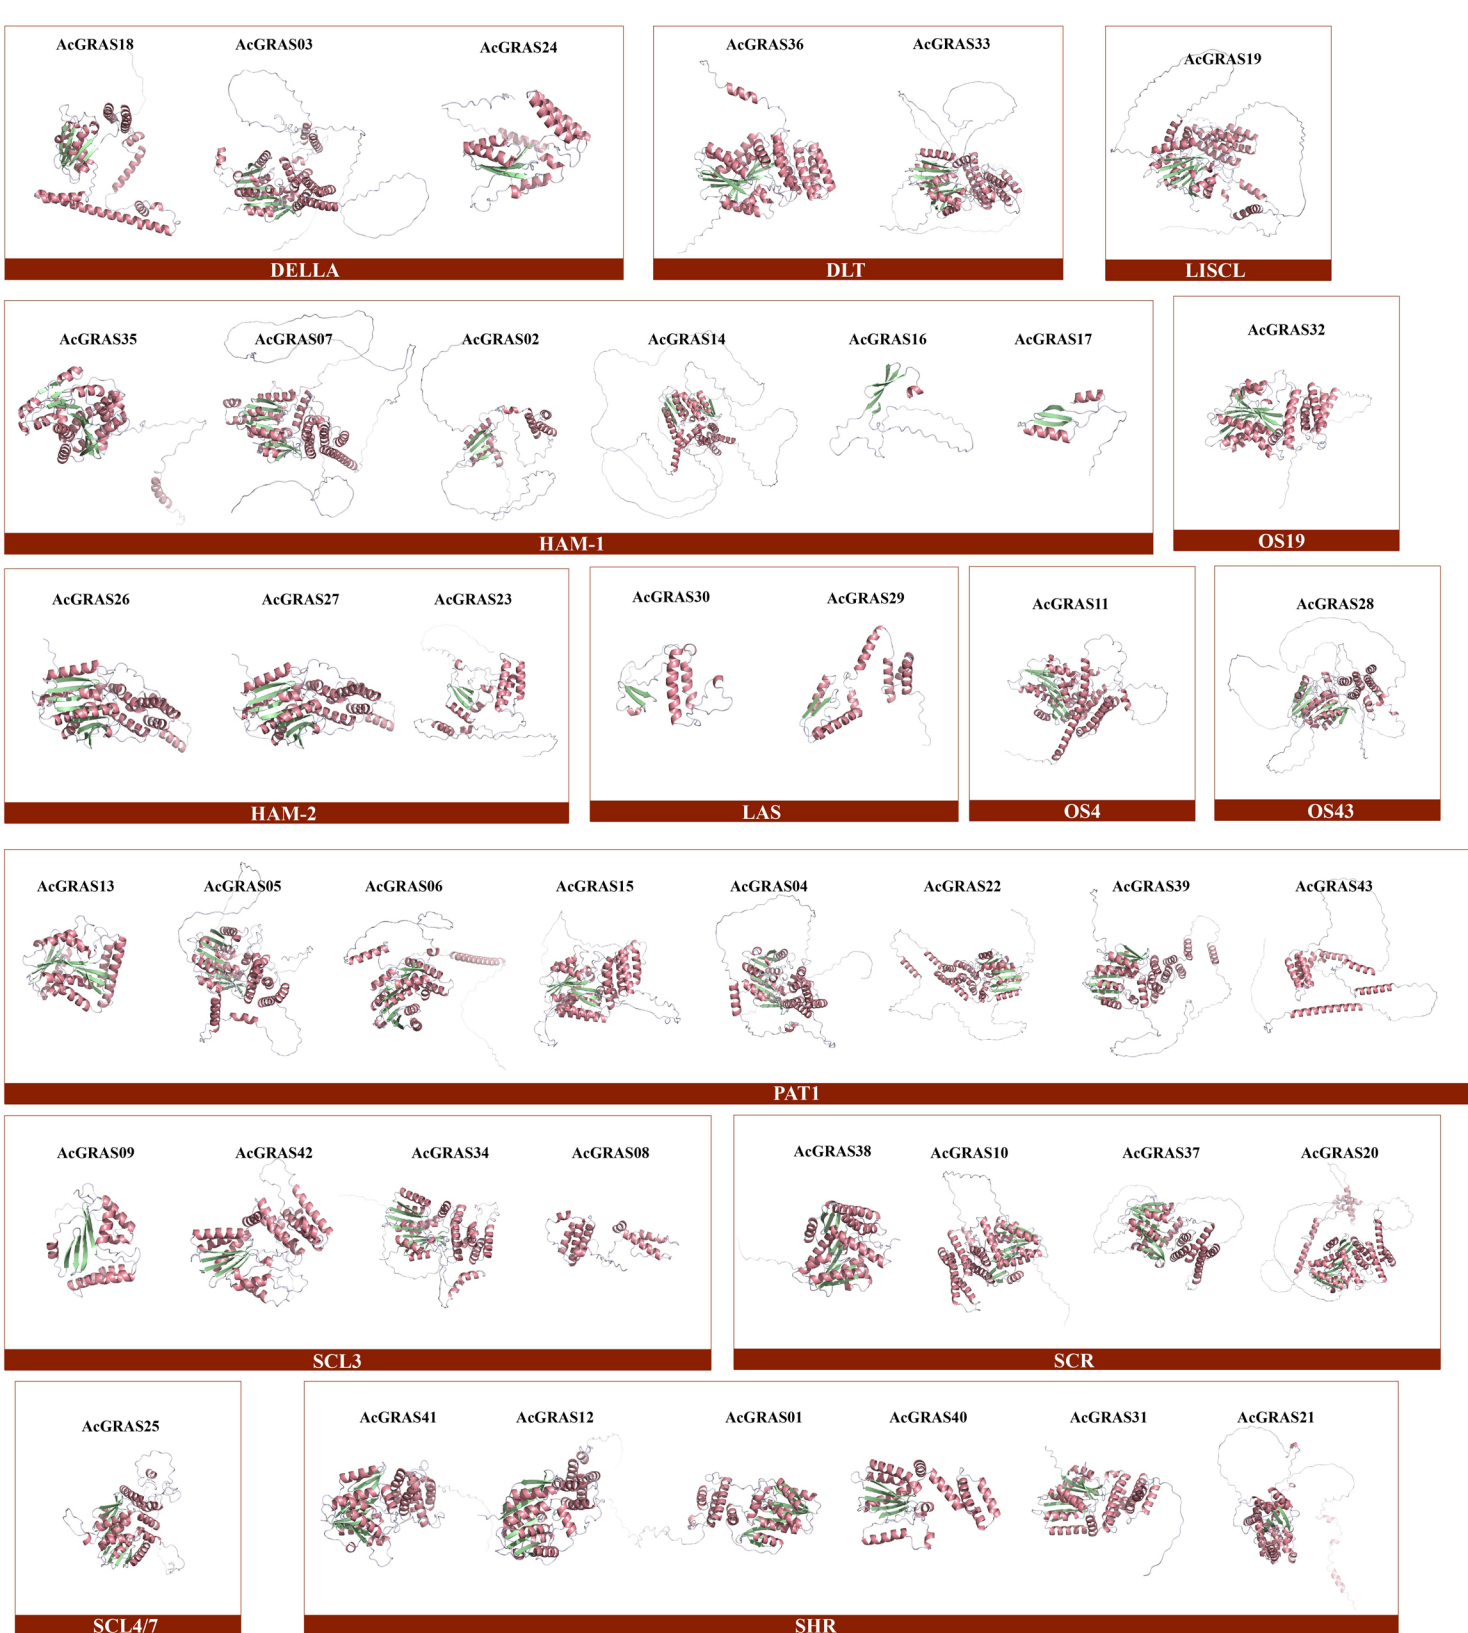

**Additional file 5: Fig. S1 Predicted 3D structural modeling of all AcGRAS proteins. Proteins of the same subfamily are grouped into the same class .**
