# Supplementary material for: The GRAS gene family and its roles in pineapple (Ananas comosus L.) developmental regulation and cold tolerance
Source: PubMed Central journal article supplement — BMC Plant Biol. 2024 Dec 19;24:1204. doi: 10.1186/s12870-024-05913-9 (PMC11657692; doi:10.1186/s12870-024-05913-9), 2024-12-19
Supplement: 12870_2024_5913_MOESM11_ESM.pdf [file 12870_2024_5913_MOESM11_ESM.pdf]

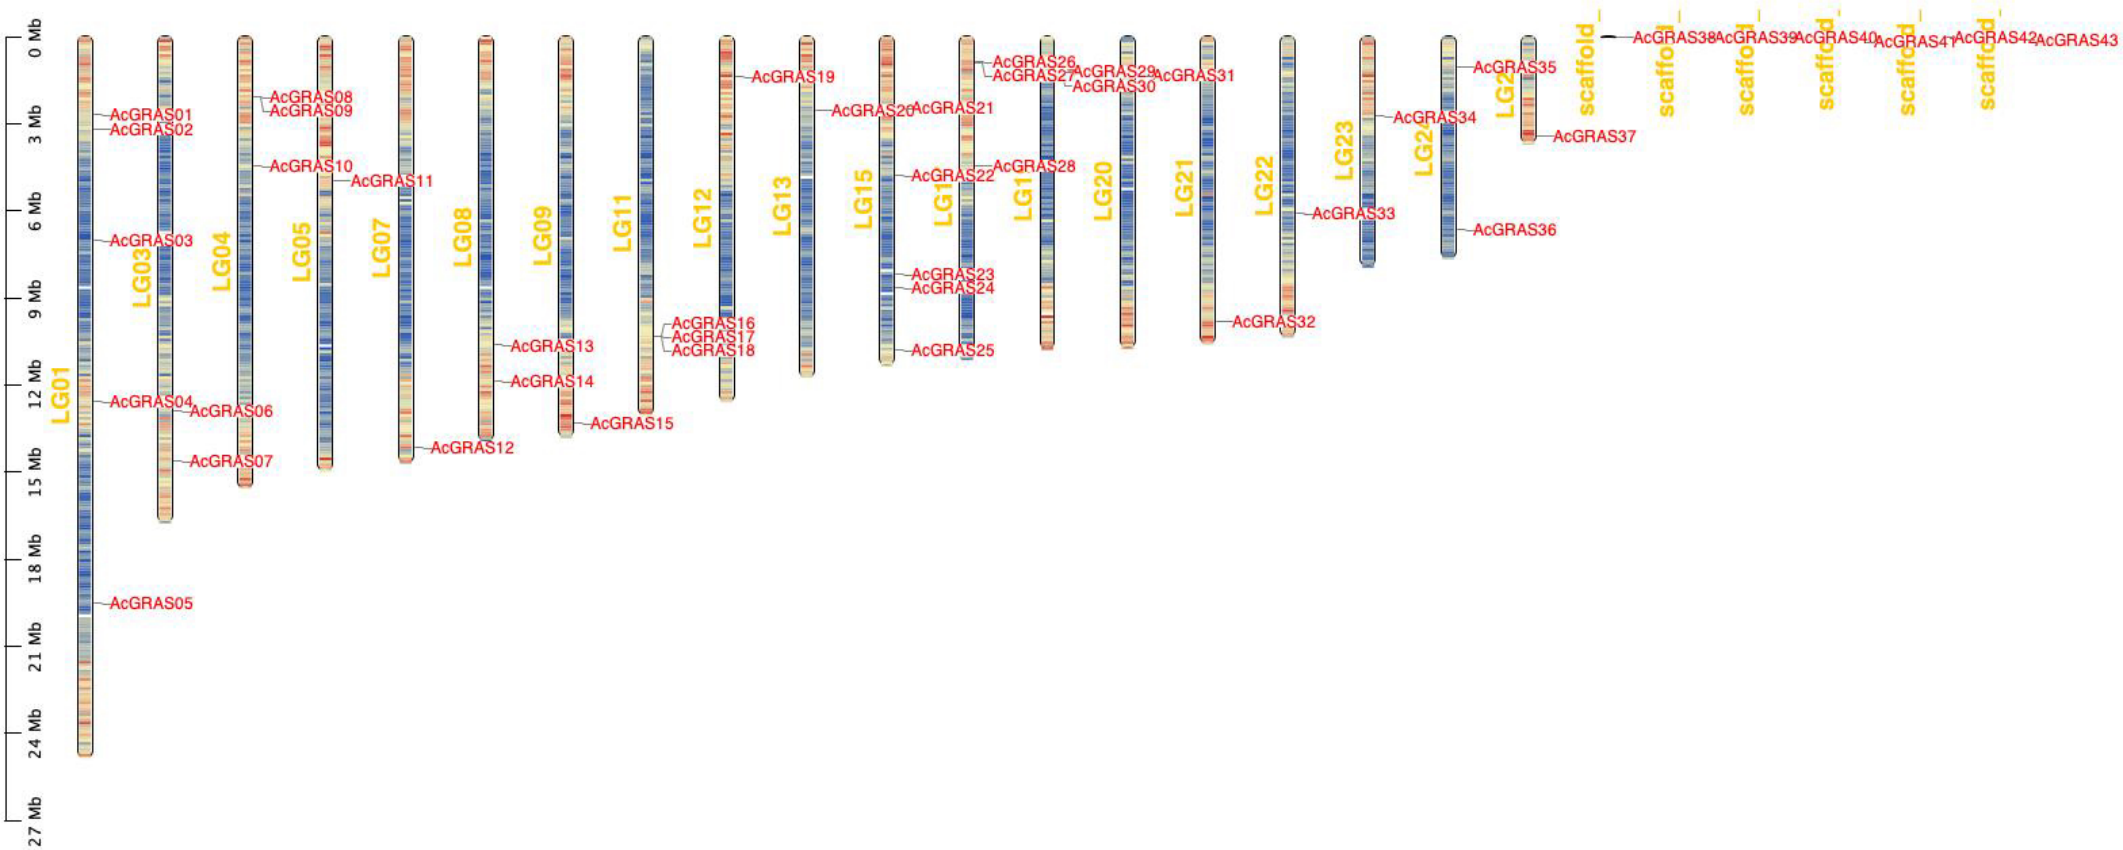

**Additional file 11: Fig. S2 Chromosome distribution and gene density of AcGRAS in pineapple. Chromosome numbers are indicated on the left side of each chromosome. The scale on the left indicates chromosome length. The different colors on the chromosomes represent gene densities, with red to blue indicating greater to lesser gene densities.**
